# Supplementary material for: A Map of Recent Positive Selection in the Human Genome
Source: PLOS journal article supplement (doi:10.1371/journal.pbio.0040072), 2006-02-22
Supplement: S2 (10.1371/journal.pbio.0040072.s002) [file journal.pbio.0040072.sg002.pdf › journal.pbio.0040072.sg002.pdf]

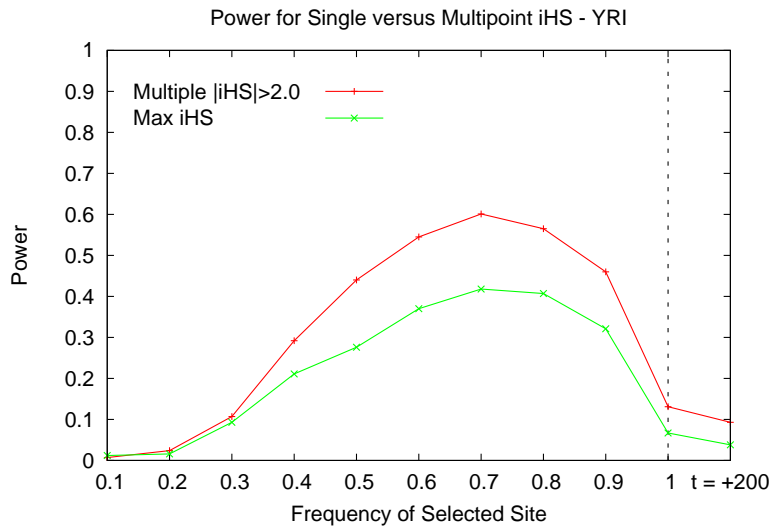

Figure S2: **Single vs multi-point iHS power plot.** Power to detect selection using iHS numerous extreme scores in a 50-SNP window versus the single most significant SNP ( $p=0.01$ ;  $\sigma = 150$ )
