# Supplementary material for: A Map of Recent Positive Selection in the Human Genome
Source: PLOS journal article supplement (doi:10.1371/journal.pbio.0040072), 2006-02-22
Supplement: S3 (10.1371/journal.pbio.0040072.s003) [file journal.pbio.0040072.st003.pdf › journal.pbio.0040072.st003.pdf]

|                         | CEU   | CEU         | YRI   | YRI        | ASN   | ASN          |
|-------------------------|-------|-------------|-------|------------|-------|--------------|
|                         | iHS S | iHS NS      | iHS S | iHS NS     | iHS S | iHS NS       |
| $P_2 < 0.05$            | 61    | 492         | 41    | 426        | 61    | 475          |
| $P_2 \geq 0.05$         | 420   | 4602        | 438   | 4660       | 418   | 4545         |
| $\chi^2(\text{pvalue})$ |       | 4.5(<0.035) |       | 0.02(<0.9) |       | 5.32(<0.025) |

Table S3: **Comparison to Clark et al. (2003) study.** Independence test between genes tested via the iHS and the genes testing significant (Model 2) along the human lineage by Clark et al. (2003).
