# Supplementary material for: A Map of Recent Positive Selection in the Human Genome
Source: PLOS journal article supplement (doi:10.1371/journal.pbio.0040072), 2006-02-22
Supplement: S12 (10.1371/journal.pbio.0040072.s012) [file journal.pbio.0040072.s012]

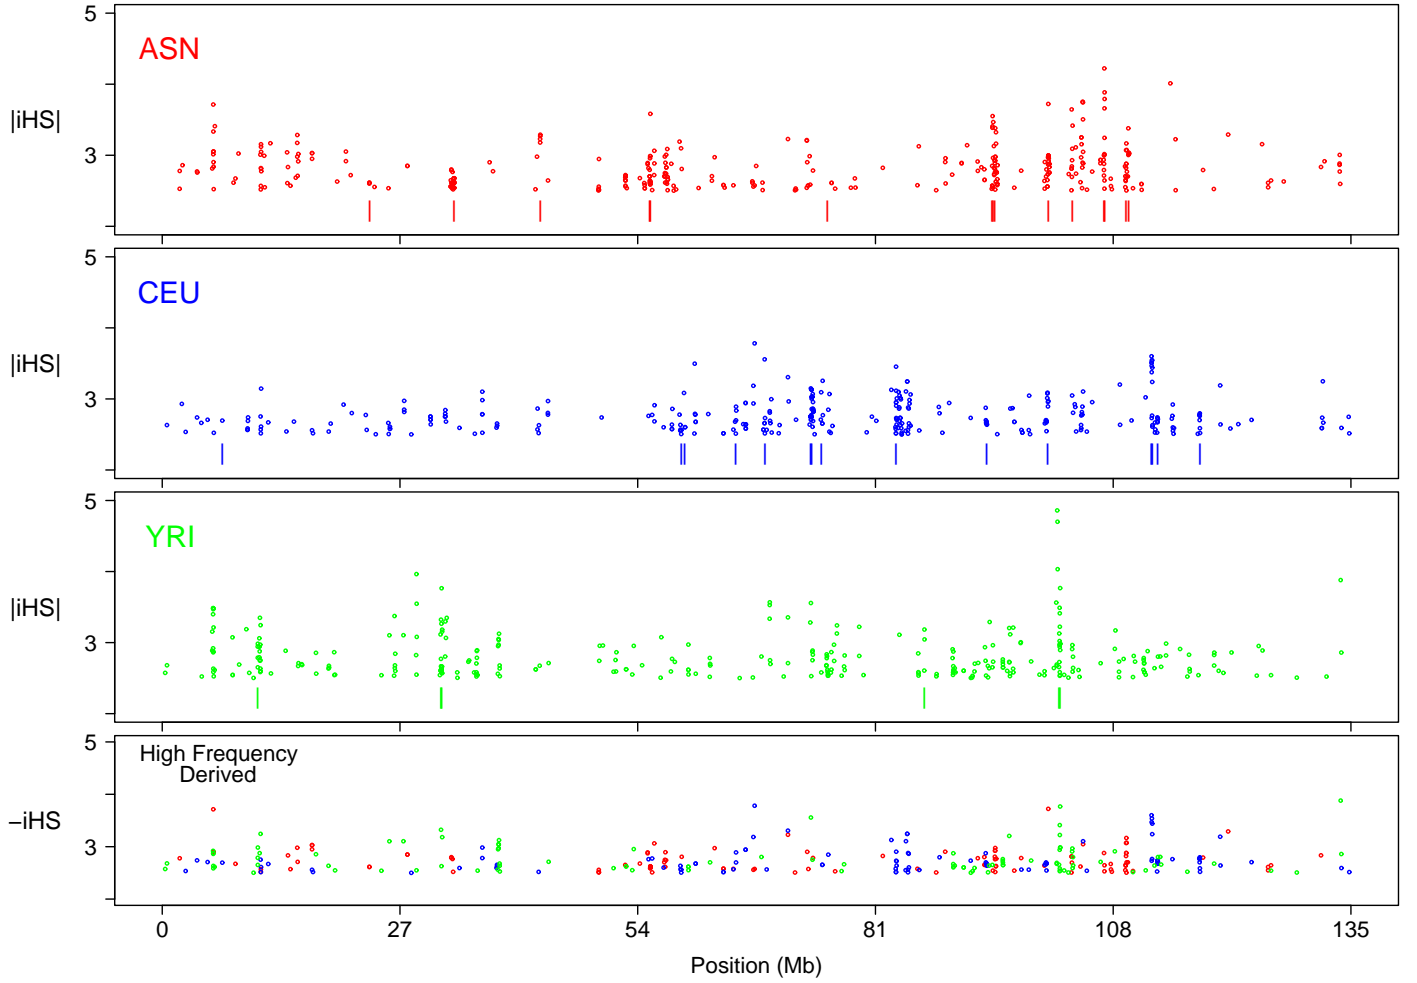

Figure S12: **Plots of Chromosome 10 SNPs with extreme  $iHS$  values illustrate discrete clusters of signals.** SNPs with  $|iHS| > 2.5$  (top 1%) are plotted. The bottom plot combines signals for all three populations, plotting only SNPs with derived frequency  $> 0.5$  and  $iHS < -2.5$ . Such SNPs correspond to high frequency derived SNPs in the range for which our test is most powerful. The short vertical bars below each plot indicate 100Kb windows whose signals are in the top 1% of windows genome-wide.
