# Supplementary material for: A Map of Recent Positive Selection in the Human Genome
Source: PLOS journal article supplement (doi:10.1371/journal.pbio.0040072), 2006-02-22
Supplement: S27 (10.1371/journal.pbio.0040072.s027) [file journal.pbio.0040072.sg027.pdf › journal.pbio.0040072.sg027.pdf]

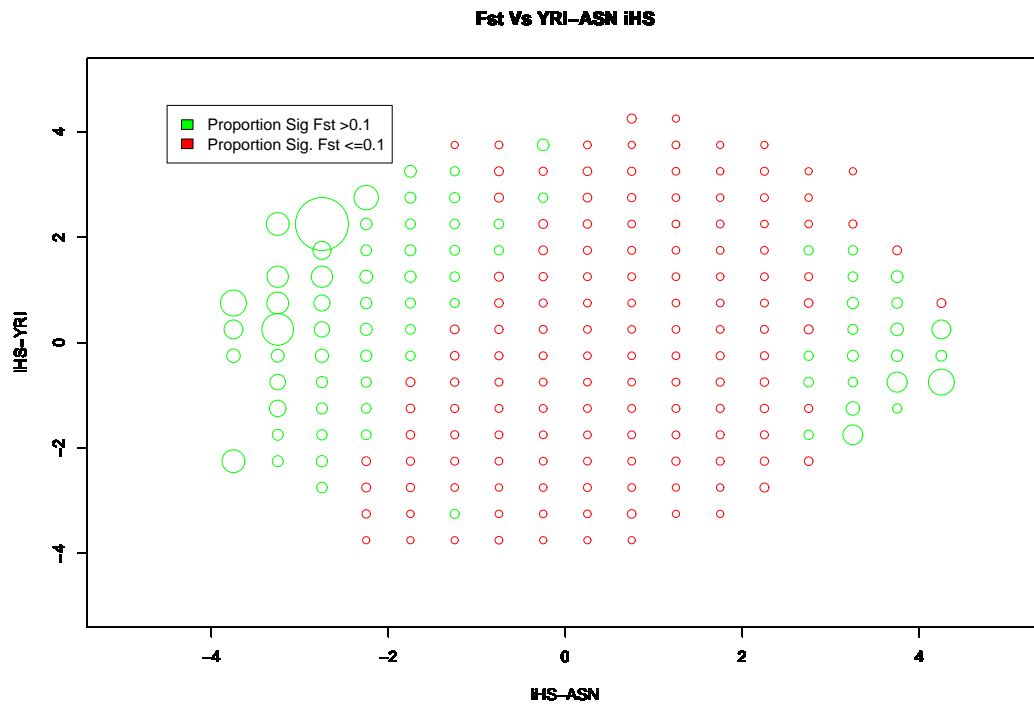

Figure S27: **Plot comparing  $F_{st}$  with  $iHS$  (ASN and YRI).**  $iHS$  in each population were grouped into bins of 0.5. The size of the circles in the plot represent the proportion of the SNPs with  $F_{st}$  greater than the genome wide empirical 5% threshold. Circles in red represent bins where the proportion of SNPs with  $F_{st}$  greater than the 5% threshold exceeds 10% and those in green represent bins where the proportion is less than 10%.
