# Supplementary figures and images for: A Map of Recent Positive Selection in the Human Genome
Source: PLOS journal article supplement (doi:10.1371/journal.pbio.0040072), 2006-02-22

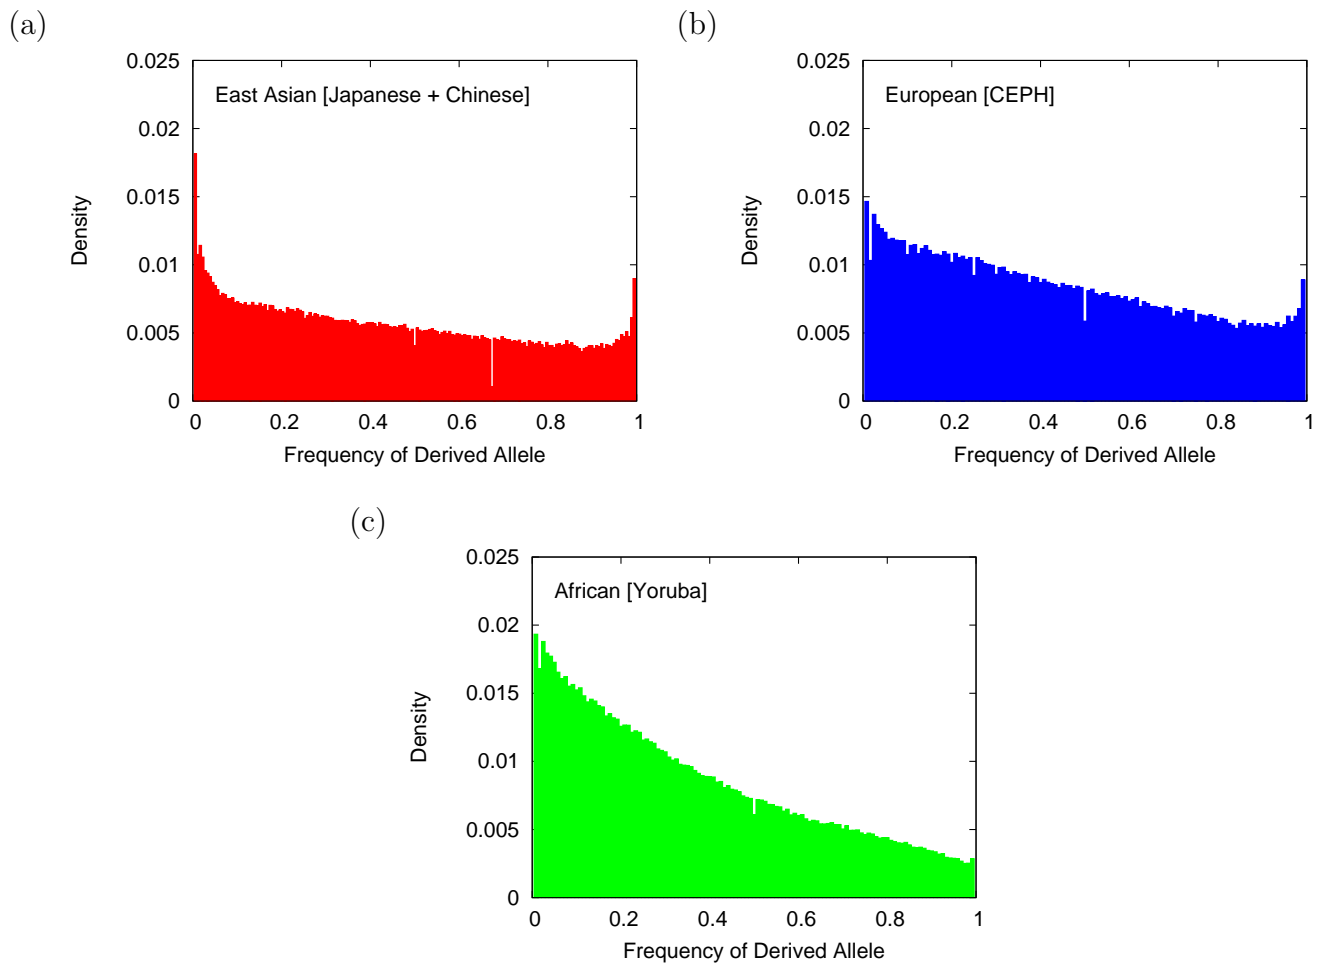

Figure S29: Polarized frequency spectra for each HapMap population.

Supplement: S29 (10.1371/journal.pbio.0040072.s029) [file journal.pbio.0040072.sg029.pdf › journal.pbio.0040072.sg029.pdf]
